# Supplementary material for: Prioritizing and characterizing functionally relevant genes across human tissues
Source: PLoS Comput Biol. 2021 Jul 16;17(7):e1009194. doi: 10.1371/journal.pcbi.1009194 (PMC8284802; doi:10.1371/journal.pcbi.1009194)
Supplement: S1 Table — (XLSX) [file pcbi.1009194.s005.xlsx]

## Sheet: Table S1
	Gene count			Mean expression
Label	N	P	U	N	P	U
Tissue									Table S1. Gene counts and mean expression values of Negative, Positive and Unlabeled sets for all tissues. NaN indicates 0 genes.
Adipose Tissue	0	62	15160	NaN	97.445	49.521
Adrenal Gland	2730	57	12379	14.762	416.337	52.358
Bladder	0	0	14515	NaN	NaN	54.545
Blood	0	646	14238	NaN	552.842	38.165
Blood Vessel	0	160	14734	NaN	149.448	59.693
Brain	1742	1572	12186	6.673	35.802	48.839
Breast	2932	109	12293	34.799	28.566	61.809
Cervix Uteri	3131	0	11850	41.364	NaN	64.948
Colon	2093	85	12906	29.333	88.544	62.127
Esophagus	3291	149	11658	30.246	58.176	69.773
Fallopian Tube	2426	0	11100	59.222	NaN	62.701
Heart	3552	477	11203	13.755	165.175	37.162
Kidney	2277	0	13228	13	NaN	35.822
Liver	3597	368	11016	74.831	61.788	45.684
Lung	2664	479	12003	40.975	97.735	58.153
Muscle	2947	929	11048	12.105	149.861	61.524
Nerve	0	65	15037	NaN	235.672	54.562
Ovary	4507	47	10592	40.954	41.933	65.79
Pancreas	2796	69	12505	7.364	1319.52	53.936
Pituitary	2	65	15372	5.823	1854.6	48.957
Prostate	3404	10	11884	28.225	21.615	60.537
Salivary Gland	3346	0	12074	27.143	NaN	65.069
Skin	2359	660	11940	18.272	124.922	65.876
Small Intestine	2539	52	12632	22.089	54.301	57.675
Spleen	0	214	15040	NaN	102.454	51.547
Stomach	2297	119	12720	16.725	42.368	52.776
Testis	1996	245	13378	10.473	31.309	59.53
Thyroid	2994	82	12175	30.914	172.861	52.61
Uterus	2651	63	12282	29.086	29.571	63.642
Vagina	3977	28	11245	42.171	23.38	65.242
