# Supplementary material for: Prioritizing and characterizing functionally relevant genes across human tissues
Source: PLoS Comput Biol. 2021 Jul 16;17(7):e1009194. doi: 10.1371/journal.pcbi.1009194 (PMC8284802; doi:10.1371/journal.pcbi.1009194)
Supplement: S2 Table — 191 genes whose germline deletion result in phenotypic aberration that could be unambiguously ascribed to one of the 6 tissues—Heart, Breast, Thyroid, Muscle, Lung, and Ovary. The tables show a few key feature values for these genes and the overall score for tissue relevance as computed by FUGUE. (XLSX) [file pcbi.1009194.s006.xlsx]

## Sheet: Table S2
Tissue	Description	ZScore	MeanExp	Breadth	CV	NeighborMeanBreadth	NeighborMeanZscore	Label	Probability		Supplementary Table S2. Mouse knock out genes with phenotypes in 6 tissues. 191 genes whose germline deletion result in phenotypic aberration that could be unambiguously ascribed to one of the 6 tissues - Heart, Breast, Thyroid, Muscle, Lung, and Ovary. The tables shows a few key feature values for these genes and the overall score for tissue relevance as computed by FUGUE.
Heart	SDHA	1.99353	243.288	0.84669	0.57954	0.26483	-0.377133	P	0.985383
Heart	TNNT2	3.95548	2449.07	1	0.458229	0.418467	0.205908	P	0.982098
Heart	ACTN2	1.19982	507.697	0.997677	0.604202	0.347131	-0.295513	P	0.976608
Heart	SCN5A	3.60689	38.1072	0.997677	0.631969	0.358164	-0.0263409	P	0.974489
Heart	MYH6	3.01634	2784.51	0.997677	1.01732	0.240589	-0.503202	P	0.97188
Heart	TMOD1	1.09591	106.307	0.868757	0.56821	0.236406	-0.418826	U	0.971417
Heart	MYBPC3	3.80668	1131.21	1	0.550642	0.599746	0.634618	P	0.971307
Heart	TPM1	1.89366	1118.82	0.965157	0.539228	0.266024	-0.379341	P	0.966239
Heart	GPD1L	1.22297	80.9823	0.773519	0.72047	0.474564	0.206171	P	0.963847
Heart	CASQ2	2.74634	439.576	0.996516	0.644865	0.205848	-0.555905	P	0.961014
Heart	ACTC1	3.51086	3179.7	1	0.690575	0.214073	-0.487312	P	0.960518
Heart	RYR2	3.25684	84.8056	0.974448	0.729833	0.25775	-0.30794	P	0.958087
Heart	TTN	0.488008	61.5972	1	0.57713	0.312784	-0.329166	P	0.952475
Heart	GATA4	1.80097	48.2903	1	0.475876	0.26806	-0.335147	P	0.950566
Heart	PLN	1.69258	662.02	0.982578	0.731628	0.596452	0.424564	P	0.949074
Heart	NPPA	2.64378	16279.5	0.95122	1.28644	0.293513	-0.320335	P	0.948045
Heart	DES	0.853582	6899.55	0.998839	0.566996	0.391212	-0.150714	P	0.946014
Heart	XIRP1	2.01375	283.718	1	1.44209	0.49637	0.179305	U	0.943967
Heart	CAV3	0.693749	11.7739	0.998839	0.585748	0.253466	-0.420743	P	0.939075
Heart	MYH7	1.60564	2733.91	0.998839	1.0931	0.3964	-0.1663	P	0.937605
Heart	SNTA1	0.904508	130.257	0.929152	0.430876	0.288224	-0.343127	P	0.934809
Heart	LDB3	1.89956	324.782	0.995354	0.561221	0.441347	0.0832178	P	0.934697
Heart	NKX2-5	3.71711	114.258	1	0.547398	0.22389	-0.44024	P	0.929453
Heart	LRRC10	3.15599	14.9188	1	0.931255	0.101045	-0.567827	U	0.929206
Heart	TNNI3	3.54164	3601.82	1	0.701441	0.763594	0.998908	P	0.925557
Heart	PKP2	2.94026	56.6446	0.962834	0.76664	0.269823	-0.500596	P	0.925295
Heart	PRKAG2	1.61972	45.1469	0.789779	0.969724	0.188802	-0.514972	P	0.923831
Heart	YME1L1	-0.870855	21.7552	0.0731707	0.483823	0.340849	-0.118325	U	0.91907
Heart	BMPR1A	-0.622889	4.29423	0.15331	0.536349	0.183836	-0.524269	U	0.918645
Heart	MYOZ2	3.38344	412.407	1	0.568846	0.444444	0.011601	P	0.911695
Heart	MYPN	0.824148	31.7183	0.997677	0.783574	0.442919	0.125221	P	0.906049
Heart	TBX20	3.00517	15.4718	1	0.965785	0.110337	-0.67923	P	0.901793
Heart	PDLIM5	1.21182	74.5074	0.888502	0.596298	0.124122	-0.737971	U	0.901117
Heart	GJA1	-0.4835	66.4052	0.233449	0.685356	0.235644	-0.480024	P	0.898826
Heart	RAF1	-0.494429	71.2113	0.238095	0.450529	0.18185	-0.598532	P	0.895586
Heart	BMPR2	-0.611596	10.2262	0.105691	0.460105	0.240886	-0.417331	P	0.893602
Heart	TNNC1	1.26347	2604.49	1	0.664987	0.616197	0.476367	P	0.89193
Heart	NEXN	0.803454	159.378	0.930314	0.684868	0.245123	-0.518583	P	0.891524
Heart	PSEN1	-1.30725	4.28189	0.00116144	0.432624	0.199593	-0.516861	P	0.89134
Heart	RAB1A	-1.0486	72.2218	0.0418118	0.466092	0.192981	-0.580589	U	0.88957
Heart	CSRP3	2.61353	804.775	1	0.903145	0.581519	0.251806	P	0.88733
Heart	KCNH2	0.769938	31.9086	0.952381	0.581641	0.277744	-0.358287	P	0.886776
Heart	PROX1	0.448009	6.18206	0.85482	0.650156	0.23273	-0.475125	U	0.880222
Heart	ERBB2	-0.342818	30.4279	0.420441	0.577986	0.186108	-0.512815	U	0.877764
Heart	PTPN11	-0.876463	22.7575	0.0534263	0.574549	0.188922	-0.55258	P	0.874657
Heart	GNAQ	-1.38853	6.40115	0.00232288	0.580822	0.193594	-0.539783	P	0.872386
Heart	DAG1	-0.100921	38.0467	0.52381	0.523037	0.200729	-0.536624	U	0.869538
Heart	GATA6	0.670231	29.8984	0.98374	0.437262	0.23799	-0.501401	P	0.869157
Heart	FLNC	0.811208	403.856	0.974448	1.73369	0.22105	-0.512296	U	0.862627
Heart	CAV1	-0.313557	116.936	0.491289	0.560241	0.192048	-0.576816	U	0.861956
Heart	CALM1	-0.592174	111.547	0.0662021	0.419264	0.172947	-0.569736	U	0.860408
Heart	TCAP	1.66624	1509.8	1	0.568646	0.502807	0.148318	P	0.856643
Heart	LRP1	-0.506212	47.8235	0.228804	0.710024	0.18619	-0.555163	N	0.854203
Heart	CALR	-0.412973	246.32	0.239257	0.729362	0.199693	-0.549147	N	0.851678
Heart	FKTN	-0.872948	2.95615	0.0313589	0.491846	0.196283	-0.513313	P	0.834152
Heart	ANK2	-0.0206686	13.6348	0.739837	0.571541	0.271752	-0.424125	P	0.830851
Heart	ESRRB	0.710905	1.57875	0.963995	0.664407	0.238669	-0.451192	U	0.828778
Heart	TECRL	3.55714	119.582	1	0.678334	0.00116144	-0.826182	U	0.828693
Heart	SRF	-0.135841	51.2486	0.621371	0.523366	0.19596	-0.562122	U	0.822465
Heart	JPH2	0.462414	45.5431	0.969803	0.561772	0.262349	-0.449325	P	0.819679
Heart	CRYAB	2.05197	1986.16	0.946574	0.87839	0.237119	-0.445538	P	0.816517
Heart	ECE1	-0.561435	44.6022	0.166086	0.531129	0.202184	-0.646788	P	0.815903
Heart	DMD	0.00640059	10.4768	0.770035	0.633005	0.249227	-0.480846	P	0.81313
Heart	EYA4	0.370252	3.49552	0.923345	0.71522	0.188831	-0.517296	P	0.811986
Heart	INVS	-0.93791	2.39382	0.0499419	0.587377	0.098795	-0.713502	P	0.811915
Heart	VCL	-0.270308	61.7593	0.500581	0.738707	0.183049	-0.605916	P	0.796686
Heart	BMP10	2.19258	214.903	0.713124	1.68488	0.0383275	-0.851266	U	0.795687
Heart	JUP	-0.263191	78.0616	0.803717	0.468178	0.182	-0.569362	P	0.785865
Heart	LAMA4	-0.481251	15.2771	0.311266	0.658664	0.193961	-0.621706	U	0.783812
Heart	MDM4	-1.02498	6.67008	0.029036	0.505214	0.113293	-0.710455	U	0.77794
Heart	HCN4	1.56459	6.13884	0.998839	0.943905	0.384105	-0.184619	U	0.773879
Heart	AKAP9	-1.05449	5.0245	0.00464576	0.48162	0.129232	-0.645333	P	0.763503
Heart	HSPG2	-0.215174	60.0753	0.602787	0.595274	0.294038	-0.440719	P	0.748117
Heart	CAP2	-0.0663873	29.9769	0.81417	0.665638	0.200073	-0.647556	U	0.745354
Heart	PSEN2	-0.918515	6.77054	0.039489	0.413077	0.149158	-0.630086	P	0.743565
Heart	TRDN	0.314806	48.7134	1	0.465532	0.220674	-0.437343	U	0.742866
Heart	MAP3K7	-1.05001	7.99351	0.0243902	0.44567	0.150297	-0.656512	N	0.742362
Heart	STAT3	-0.614146	57.4977	0.160279	0.718607	0.152685	-0.644007	N	0.741428
Heart	DVL2	-1.15721	10.2822	0.00232288	0.4706	0.139861	-0.689369	U	0.739758
Heart	PEPD	-1.08862	15.0249	0.00116144	0.446727	0.171644	-0.539376	N	0.7316
Heart	TIMP3	-0.213206	356.36	0.515679	0.787616	0.260114	-0.373677	U	0.727581
Heart	ACSL1	-0.335938	60.235	0.405343	0.77652	0.483785	0.238857	U	0.70596
Heart	MKS1	-1.04631	3.69038	0.00348432	0.434061	0.13236	-0.719629	P	0.705601
Heart	ACE2	0.30508	8.24079	0.99187	0.890713	0.222222	-0.637793	N	0.701076
Heart	DSG2	0.111058	11.3881	0.803717	0.786646	0.255424	-0.432874	P	0.699854
Heart	ILK	-0.464549	79.2487	0.301974	0.394947	0.143039	-0.672518	U	0.691978
Heart	KCNQ1	0.0562811	15.9858	0.947735	0.493198	0.231956	-0.505195	P	0.67646
Heart	DNM1L	-0.795021	18.8811	0.0511034	0.451971	0.148466	-0.669654	U	0.66841
Heart	DAAM1	-0.232983	14.7064	0.432056	0.577547	0.137573	-0.616183	U	0.656461
Heart	NOTCH1	-0.766467	10.4246	0.0452962	0.536472	0.0775418	-0.814035	P	0.649735
Heart	DOCK1	-1.08027	8.73151	0.00348432	0.468394	0.0896632	-0.787153	U	0.647748
Heart	FLNA	-0.52211	133.047	0.068525	0.677444	0.153783	-0.623517	U	0.639873
Heart	DSP	-0.211213	56.6239	0.917538	0.765816	0.181594	-0.588958	P	0.633088
Heart	PDLIM3	-0.0220109	136.031	0.910569	0.785656	0.543864	0.142341	U	0.630203
Heart	TGFB3	-0.133963	17.8709	0.541231	0.81296	0.27606	-0.424193	P	0.627383
Heart	RBM20	2.73258	27.231	0.969803	0.586006	0.465157	-0.0501173	P	0.627276
Heart	DICER1	-1.12652	7.13753	0.00696864	0.478984	0.119024	-0.762143	U	0.623616
Heart	TRPM4	-0.256014	16.2011	0.428571	0.483913	0.174345	-0.448035	P	0.616023
Heart	NOS3	0.00641801	9.80848	0.688734	0.792022	0.156071	-0.684467	N	0.614756
Heart	DTNA	-0.182444	12.8505	0.772358	0.51579	0.242378	-0.599221	P	0.605644
Heart	GALNT1	-0.852114	11.4575	0.0464576	0.535638	0.0448738	-0.790626	U	0.600034
Heart	BAG3	0.088128	111.859	0.670151	0.892626	0.152839	-0.652149	P	0.595115
Heart	KCND3	-0.134537	6.79372	0.658537	0.588078	0.19328	-0.551607	U	0.594931
Heart	DCHS1	-0.413053	6.68575	0.351916	0.578897	0.117596	-0.718316	P	0.592469
Heart	CALM2	-1.05686	218.403	0.00348432	0.430829	0.17399	-0.56583	P	0.591537
Heart	PPARG	-0.344618	5.47195	0.416957	0.536591	0.118663	-0.745985	N	0.590796
Heart	NR2F2	-0.564663	17.5015	0.10453	0.620264	0.168615	-0.606396	P	0.590553
Heart	SGCD	0.748404	13.9541	0.880372	0.693441	0.541548	0.0898001	P	0.59051
Heart	MED1	-0.855464	4.39088	0.0150987	0.486778	0.118773	-0.760873	U	0.582185
Heart	PHC1	-0.734758	5.25021	0.0278746	0.462875	0.147235	-0.679587	U	0.581923
Heart	SMAD9	-0.53237	4.61852	0.236934	0.850066	0.114195	-0.753002	U	0.575389
Heart	GJA5	0.348622	15.4638	0.817654	1.20787	0.119822	-0.667104	U	0.574434
Heart	RPSA	-0.998704	267.703	0.0220674	0.531349	0.118829	-0.765818	U	0.571669
Heart	CITED2	-0.484119	33.2487	0.0963995	0.701482	0.145595	-0.71115	P	0.569227
Heart	MYL3	2.46867	1949.64	1	1.13339	0.687573	-0.233903	P	0.568283
Heart	IFT172	-0.613718	7.61492	0.113821	0.48613	0.144772	-0.627858	P	0.56775
Heart	ABCC9	0.103461	8.49412	0.785134	0.502702	0.484514	0.0287922	P	0.564827
Heart	TMEM43	-0.714142	46.7567	0.0813008	0.614768	0.100212	-0.775553	P	0.563576
Heart	ZFPM2	-0.171417	4.24822	0.612079	0.546653	0.17162	-0.695577	N	0.556571
Heart	SAP130	-0.853107	6.54807	0.00232288	0.446031	0.0850385	-0.797735	U	0.556208
Heart	SNAI1	-0.18445	9.80967	0.484321	1.14825	0.0758436	-0.779984	U	0.546993
Heart	SCN1B	-0.0552442	17.1295	0.796748	0.70374	0.340496	-0.400834	P	0.546981
Heart	PPP1R13L	0.0778909	48.1084	0.921022	0.455832	0.111252	-0.730617	U	0.546516
Heart	CACNB2	0.00075732	8.63066	0.774681	0.629831	0.142083	-0.612121	P	0.538723
Heart	RXRA	-0.938387	11.7878	0.00116144	0.409422	0.148806	-0.695114	U	0.536247
Heart	KCNJ5	0.179993	4.74923	0.87921	0.962767	0.141309	-0.743364	P	0.534944
Heart	PPP3CA	-0.594094	6.59122	0.00464576	0.591329	0.127546	-0.642497	N	0.523686
Heart	NCOA6	-1.2643	5.40155	0.00232288	0.425672	0.124793	-0.752758	U	0.514256
Heart	FKBP1B	-0.621517	2.93227	0.0162602	0.594813	0.183647	-0.591523	U	0.509654
Heart	NR1D2	-0.822682	9.13521	0.0615563	0.641999	0.100099	-0.856264	U	0.505012
Heart	TFAP2B	-0.32291	0.0232756	0.30662	3.93979	0.142018	-0.716792	P	0.500252
Heart	PDCD1	0.402436	3.94381	0.781649	1.10599	0.128116	-0.718147	N	0.491474
Heart	ADORA2A	-0.244985	3.95915	0.485482	0.578395	0.15386	-0.560568	N	0.488393
Heart	HEY2	-0.0503788	12.5433	0.641115	0.94421	0.391405	-0.385456	U	0.487881
Heart	KCNA5	0.35342	20.4662	0.760743	1.15527	0.112273	-0.777245	P	0.484258
Heart	SMAD6	0.332652	12.2396	0.800232	0.903302	0.0984562	-0.701781	P	0.480088
Heart	TLL1	-0.553472	0.477463	0.0940767	1.43127	0.10724	-0.598914	P	0.463761
Heart	JAG1	-0.571215	15.7319	0.0801394	0.588319	0.131653	-0.660832	P	0.463265
Heart	BMP4	-0.36166	6.13565	0.262485	0.745073	0.0847614	-0.836151	U	0.461077
Heart	NUP155	-0.548403	2.32134	0.00929152	0.464701	0.13841	-0.714335	U	0.438602
Heart	GATAD1	-0.997046	14.2583	0.0150987	0.485148	0.0805023	-0.920186	P	0.436033
Heart	YWHAE	-0.839881	164.74	0.0592334	0.426887	0.153926	-0.616526	N	0.435008
Heart	KCNK3	-0.148973	6.303	0.497096	1.10696	0.129342	-0.79239	P	0.433452
Heart	SCN4B	-0.207112	10.6347	0.656214	0.698078	0.0813008	-0.252686	P	0.427278
Heart	MYOCD	-0.122893	7.65108	0.898955	0.643166	0.188008	-0.668251	U	0.427229
Heart	ELN	-0.198032	83.2188	0.507549	1.21985	0.332033	-0.270172	U	0.425885
Heart	PTGER4	-0.574257	3.18135	0.10453	0.629508	0.12801	-0.736668	U	0.406657
Heart	FBN1	-0.179007	21.2624	0.511034	0.990199	0.410871	-0.321387	U	0.397348
Heart	MYL2	1.46557	7770.16	0.995354	1.3364	0.535811	-0.261394	P	0.389845
Heart	DOT1L	-0.622318	6.3385	0.068525	0.774883	0.0967969	-0.762542	N	0.372687
Heart	PKD1	-0.395422	21.8414	0.097561	0.418341	0.204721	-0.513254	U	0.36992
Heart	MED13L	-1.09377	5.44322	0.00116144	0.50866	0.0953505	-0.815775	P	0.368101
Heart	PPARGC1A	1.25475	16.1325	0.897793	1.38592	0.134929	-0.737852	U	0.359634
Heart	SLC39A8	-0.100997	8.56822	0.461092	1.76815	0.10632	-0.749079	U	0.354588
Heart	LMNA	-0.593273	70.9226	0.0882694	0.565108	0.127867	-0.713953	P	0.341553
Heart	IFNG	-0.0850285	0.167285	0.432056	2.85165	0.155827	-0.605214	U	0.328159
Heart	RBPJ	-1.17179	10.301	0.00813008	0.515853	0.0944696	-0.759992	U	0.315694
Heart	CTSV	-0.312562	0.0433084	0.0162602	1.07676	0.186499	-0.504248	U	0.304235
Heart	NTF3	-0.359129	0.938038	0.304297	0.926142	0.352033	-0.30121	U	0.299018
Heart	HTR2B	-0.104628	2.03793	0.619048	1.47881	0.150158	-0.610566	N	0.298418
Heart	VIP	-0.24969	1.93325	0.422764	0.724119	0.213357	-0.470551	U	0.297502
Heart	PFKFB3	-0.490582	11.8216	0.0360046	1.06913	0.1476	-0.601544	U	0.282935
Heart	MTPN	-0.885644	34.6693	0.068525	0.5615	0.063334	-0.849397	N	0.271402
Heart	KCNE3	-0.334406	1.57282	0.275261	0.905757	0.115912	-0.662507	P	0.253357
Heart	DNAH5	-0.30912	0.0259268	0.0127758	1.18808	0.199252	-0.55842	U	0.253215
Heart	HCN1	-0.0763868	0.655996	0.529617	1.44608	0.499613	-0.0490391	N	0.243885
Heart	SCN2B	-0.178215	3.37226	0.890825	0.904414	0.097164	-0.786847	P	0.236544
Heart	KCNJ2	0.0762531	3.90184	0.615563	0.961966	0.561639	-0.124473	P	0.22824
Heart	DSC2	-0.18516	2.51036	0.794425	0.660696	0.374177	-0.319236	P	0.223011
Heart	MYLK2	-0.174518	0.411743	0.365854	1.23265	0.095158	-0.723294	U	0.178607
Heart	DNAH11	-0.211785	0.291352	0.404181	1.48186	0.304297	-0.462958	U	0.170257
Heart	FGF8	-0.384563	0.0384142	0.168409	1.81758	0.0522101	-0.907058	U	0.162287
Heart	TNFSF4	-0.357374	0.695456	0.199768	0.81168	0.0371661	-0.982666	U	0.160688
Heart	KCNE1	-0.161422	0.452326	0.781649	1.10773	0.33385	-0.334451	P	0.142071
Heart	CENPF	-0.264521	0.177311	0.0917538	2.47479	0.147345	-0.622285	N	0.113794
Heart	SCN3B	-0.379961	0.736151	0.0418118	0.75459	0.0861825	-0.772015	P	0.111311
Heart	KCNE2	-0.129869	0.256806	0.0708479	1.26487	0.682927	0.238398	U	0.0671569
Heart	SLC6A2	-0.306395	0.00948149	0.0464576	2.19777	0.0232288	-0.60224	N	0.0587045
Heart	EGFR	-0.841011	4.49185	0.00348432	0.577752	0.156542	-0.627444	N	0.0559497
Breast	RB1CC1	0.0297091	22.4058	0.544662	0.303384	0.61681	0.0995744	P	0.931125
Breast	ESR1	1.14001	15.1904	0.96732	1.5294	0.638163	0.171994	P	0.901114
Breast	ETV6	0.946555	34.6213	0.810458	0.713445	0.60211	0.1523	U	0.884493
Breast	MET	1.02803	16.4162	0.989107	0.40511	0.731502	0.19663	U	0.873149
Breast	PHB	0.456693	128.632	0.769063	0.332174	0.612545	0.121101	P	0.811124
Breast	PIK3CA	0.78549	18.3175	0.928105	0.303391	0.672547	0.180574	P	0.787669
Breast	CHEK2	0.0975215	4.74098	0.727669	0.558584	0.608808	0.0896062	P	0.783649
Breast	MYC	0.604286	161.854	0.991285	0.485379	0.642311	0.148367	U	0.77893
Breast	SMARCA4	-0.0527381	33.3466	0.518519	0.345641	0.63127	0.147846	U	0.747531
Breast	ERBB2	0.145999	52.0505	0.551198	1.13058	0.615258	0.0552478	U	0.739006
Breast	STAT1	-0.0783176	43.0849	0.742919	0.418077	0.643682	0.137289	N	0.727441
Breast	KRAS	-0.156225	13.3141	0.389978	0.279662	0.651008	0.195478	U	0.725533
Breast	CAV1	0.661031	347.638	0.971678	0.514614	0.785113	0.351427	U	0.713041
Breast	CASP8	0.0492687	7.144	0.899782	0.344457	0.656394	0.128099	P	0.694486
Breast	APC	-0.303953	6.95186	0.348584	0.287429	0.647315	0.138903	P	0.692193
Breast	PPM1D	0.757299	12.3057	0.921569	0.310325	0.605256	0.0571154	U	0.68763
Breast	PALB2	0.333997	6.09481	0.749455	0.297285	0.595215	0.00709109	P	0.684062
Breast	ATM	-0.0756763	7.08965	0.535948	0.452882	0.632249	0.121545	P	0.680793
Breast	XRCC3	0.0915272	26.8479	0.59695	0.354499	0.659431	0.150599	P	0.658501
Breast	TP53	0.593821	25.2281	0.836601	0.368125	0.631239	0.142072	U	0.601953
Breast	AKT1	0.352252	60.8446	0.812636	0.264663	0.62342	0.0895445	P	0.49773
Breast	BRCA2	-0.124383	0.510808	0.795207	0.596438	0.633094	0.0997165	P	0.458138
Breast	RAD51	-0.243342	0.77735	0.607843	0.942219	0.635134	0.0979556	U	0.420644
Breast	CDH1	0.173918	38.5492	0.657952	1.05244	0.639574	0.118468	P	0.415
Breast	NQO2	-0.0909502	9.6203	0.583878	0.380602	0.652142	0.100009	P	0.374508
Breast	BARD1	-0.139035	3.64693	0.54902	0.550138	0.618695	0.142249	P	0.373774
Breast	BRCA1	-0.274994	1.41188	0.433551	0.440481	0.64416	0.163333	P	0.246946
Breast	BRIP1	-0.173925	0.438132	0.699346	0.888301	0.61467	0.0745778	P	0.231177
Breast	HGF	0.184028	5.19121	0.836601	0.78849	0.682522	0.11284	U	0.226041
Breast	HMMR	-0.236132	0.465957	0.348584	1.65312	0.597078	0.0399844	U	0.182798
Breast	ESPL1	-0.273707	0.761387	0.714597	1.07508	0.586619	0.0126328	U	0.161425
Breast	RAD54L	-0.308636	0.604947	0.252723	1.53977	0.603214	0.0445302	P	0.0827394
Breast	WNT1	-0.20126	0.195477	0.542484	1.23243	0.752723	0.399311	U	0.0540242
Lung	SFTPB	3.96739	5190.1	0.99827	0.89873	0.991349	3.16005	P	0.976823
Lung	SCGB3A2	3.07653	264.648	1	1.41059	1	3.08647	P	0.931659
Lung	SLC34A2	3.75699	581.395	0.99827	0.945049	0.78143	0.510467	P	0.918452
Lung	SFTPC	3.35516	4049.83	0.99827	1.23617	0.881055	0.788719	P	0.897379
Lung	ABCA3	3.35496	180.146	0.977509	0.954675	0.688581	0.488195	P	0.881564
Lung	RB1	0.881852	24.6376	0.932526	0.301376	0.772973	0.330816	P	0.879761
Lung	KRAS	0.847928	20.9311	0.915225	0.284095	0.776714	0.368095	U	0.864931
Lung	CASP8	0.939119	16.1328	0.99654	0.452487	0.785921	0.438144	P	0.855319
Lung	TP53	0.011923	17.597	0.555363	0.406621	0.68532	0.175849	U	0.849098
Lung	ADRB2	0.684022	19.9388	0.99827	0.54912	0.653616	0.193326	P	0.799502
Lung	EPAS1	3.45687	1121.98	1	0.49088	0.755077	0.407774	U	0.789847
Lung	JUN	0.599234	455.029	0.903114	0.904063	0.732169	0.312822	U	0.769811
Lung	IRF1	1.95433	109.198	0.99827	1.2058	0.859605	0.514882	P	0.762068
Lung	PIK3CA	0.510795	16.1563	0.884083	0.29068	0.804726	0.476276	P	0.751622
Lung	PLA2G7	1.52663	15.9647	0.986159	0.93717	0.301038	-0.335347	P	0.729255
Lung	TSC1	0.146871	22.6445	0.717993	0.294283	0.71235	0.291026	P	0.72162
Lung	TSC2	0.116732	46.1629	0.743945	0.2601	0.749499	0.318102	P	0.714187
Lung	PPP2R1B	-0.0848519	12.3664	0.724913	0.294404	0.758422	0.420312	P	0.712271
Lung	DICER1	0.789896	29.7671	0.904844	0.334826	0.788398	0.404315	U	0.71206
Lung	IL4R	1.92933	184.067	1	0.501405	0.870652	0.592046	P	0.705422
Lung	TLR4	0.586889	25.6859	0.99654	0.458565	0.88614	0.433986	N	0.686891
Lung	ERBB2	0.0638298	48.4158	0.866782	0.321521	0.745119	0.300337	P	0.676162
Lung	FASLG	0.850691	2.1845	0.975779	0.994771	0.837471	0.541971	U	0.65777
Lung	XPC	0.128377	36.7736	0.719723	0.293582	0.65579	0.114801	U	0.6453
Lung	HNMT	0.400995	18.8048	0.903114	0.418016	0.70199	0.461876	P	0.624634
Lung	MAP3K8	1.96065	64.4662	0.99481	0.45714	0.870649	1.00277	P	0.585682
Lung	VEGFA	0.422381	186.731	0.975779	0.532866	0.831964	0.51396	U	0.579865
Lung	FOSL2	0.420549	147.11	0.782007	0.506063	0.784833	0.357514	U	0.565169
Lung	BRAF	0.835914	16.3869	0.916955	0.299606	0.814624	0.505816	P	0.551881
Lung	ATF2	0.310148	23.4729	0.740484	0.252474	0.753593	0.352052	U	0.549444
Lung	FLCN	0.586343	55.5496	0.884083	0.37618	0.680748	0.20845	P	0.538784
Lung	YY1	0.459551	35.55	0.847751	0.231947	0.774771	0.409944	U	0.501545
Lung	ERCC6	-0.176125	3.77943	0.427336	0.358515	0.696675	0.225871	P	0.493638
Lung	CSF2	2.39475	2.3661	1	1.63449	0.907266	0.766953	U	0.483436
Lung	TBX21	0.49432	7.68076	0.99827	0.76866	0.679931	0.0728102	P	0.470693
Lung	CYBA	0.632065	145.614	1	0.351958	0.974625	0.62097	P	0.45059
Lung	PTMA	0.443808	697.747	0.842561	0.269981	0.76568	0.381637	U	0.437781
Lung	ROBO1	0.270161	11.6847	0.688581	0.41059	0.801274	0.597704	U	0.428623
Lung	ELK3	0.563702	39.11	0.980969	0.382507	0.882353	0.587785	U	0.426081
Lung	MUS81	0.69964	43.8737	0.877163	0.317819	0.746074	0.261961	N	0.419927
Lung	BLOC1S6	0.348452	20.9945	0.780277	0.218195	0.685935	0.187542	U	0.416558
Lung	NCF4	0.174965	78.8642	1	0.491995	0.922338	0.414317	P	0.402422
Lung	NCF2	0.295537	96.021	1	0.446937	0.913119	0.380884	P	0.395152
Lung	HMOX1	0.831518	223.936	0.974048	1.0453	0.831142	0.573584	P	0.394119
Lung	EGFR	-0.0331638	23.7011	0.653979	0.414717	0.709367	0.260327	U	0.38539
Lung	CCL11	0.465103	16.3599	0.974048	2.66376	0.923227	0.425162	P	0.383641
Lung	KL	1.52234	8.14182	0.99481	0.757411	0.82526	0.405178	U	0.379395
Lung	HLA-G	1.3	14.2802	0.991349	0.55465	0.897636	0.802864	U	0.367131
Lung	ITGB6	2.58143	26.2502	1	0.623981	0.672145	0.113944	U	0.340249
Lung	RUNX3	0.284041	18.2676	0.99654	0.600164	0.81202	0.500808	N	0.339696
Lung	FOXM1	-0.0628383	4.7295	0.842561	1.52991	0.705912	0.195554	U	0.319057
Lung	CSF2RB	0.444782	25.6023	1	0.571775	0.938798	0.657379	P	0.310374
Lung	CYBB	1.24667	57.8972	0.99654	0.661929	0.986159	0.313341	U	0.305388
Lung	NDST1	0.948483	51.3426	0.942907	0.335225	0.808947	0.309993	U	0.298492
Lung	ITGA9	0.114088	12.1902	0.955017	0.428907	0.743368	0.421438	U	0.272141
Lung	SMO	-0.412794	8.34996	0.316609	0.721915	0.609896	-0.0503237	U	0.216039
Lung	TERT	-0.244992	0.0382574	0.626298	1.67154	0.655003	0.147522	U	0.215624
Lung	PTGER2	0.311097	11.1344	0.99654	0.396453	0.837803	0.470589	P	0.214906
Lung	IL13	-0.118121	0.268083	0.712803	3.08368	0.811419	0.653535	P	0.205848
Lung	NCF1	0.048807	17.4175	1	0.773586	0.803659	0.392774	P	0.204952
Lung	FUT8	-0.209874	7.28875	0.583045	0.321918	0.815208	0.34609	U	0.143422
Lung	MMP1	0.00956046	13.6476	0.958478	4.02475	0.783737	0.440476	P	0.10581
Lung	MUC7	-0.0715905	1.14064	0.456747	2.80088	0.679931	0.0627904	U	0.0961907
Lung	FBN1	0.0179452	32.7926	0.946367	0.64792	0.74083	0.141747	U	0.0898496
Lung	MUC5B	-0.0452034	5.4204	0.892734	3.35353	0.734645	0.0716789	U	0.0792183
Lung	FGF9	-0.0691891	1.85485	0.856401	0.804192	0.730277	0.543172	N	0.0729499
Muscle	BIN1	4.14448	1000.29	1	0.308533	0.214074	-0.362143	P	0.993043
Muscle	MYH2	3.1155	1590.21	1	1.02305	0.573319	1.18546	P	0.989028
Muscle	MYPN	4.0102	124.101	1	0.374112	0.637609	1.55638	U	0.985353
Muscle	TTN	4.17761	369.68	1	0.362413	0.484433	0.581245	P	0.984865
Muscle	RYR1	4.27383	449.641	1	0.344213	0.522368	0.874064	P	0.984049
Muscle	BAG3	2.13477	388.205	1	0.413152	0.282632	-0.258763	P	0.981241
Muscle	ACTA1	3.74999	35988.2	1	0.63839	0.562741	0.75464	P	0.980973
Muscle	FOXO1	1.40563	78.8337	0.762142	0.803032	0.299839	-0.369299	U	0.980877
Muscle	TPM3	3.75636	840.42	0.98132	0.565819	0.62274	0.961717	P	0.980269
Muscle	DNAJB6	2.0135	56.2574	0.998755	0.270863	0.363336	0.0808806	P	0.979575
Muscle	NEB	4.22512	899.78	1	0.3833	0.501245	0.694007	P	0.979556
Muscle	TPM2	1.94563	4111.7	1	0.378278	0.513149	0.784911	P	0.977797
Muscle	PLEC	1.08125	154.162	0.971357	0.324708	0.230591	-0.315256	P	0.97445
Muscle	MYH7	2.8148	4529.26	1	0.769923	0.693545	1.57014	P	0.972594
Muscle	TNNT3	3.70328	2789.22	1	0.686573	0.549606	1.13256	P	0.97209
Muscle	ATP2A1	3.49473	1586.97	1	0.806551	0.469863	0.312514	P	0.969875
Muscle	MYH3	0.936358	21.7846	0.871731	2.73885	0.354504	0.290955	P	0.965885
Muscle	CAV3	3.88609	50.5135	1	0.496543	0.406276	0.0997254	P	0.965491
Muscle	TNNT1	3.94885	5077.65	1	0.552	0.840406	1.75332	P	0.962382
Muscle	MYOT	3.62585	763.74	1	0.728873	0.575698	1.38351	P	0.961664
Muscle	ASPSCR1	0.110102	15.2429	0.531756	0.43363	0.336796	-0.0388841	U	0.961322
Muscle	FLNC	2.96801	1128.94	1	0.57192	0.299055	-0.195563	P	0.9608
Muscle	KLHL41	4.28282	3569.63	1	0.340288	0.786091	2.12913	P	0.960272
Muscle	CFL2	2.65371	128.652	1	0.332811	0.609243	0.623583	P	0.959421
Muscle	MAP3K20	2.08443	119.765	1	0.424398	0.217607	-0.44392	N	0.959215
Muscle	TRIM32	0.834048	15.1645	0.841843	0.605503	0.285356	-0.295605	P	0.957221
Muscle	DMD	1.22163	25.2668	0.995019	0.451134	0.315068	-0.205383	P	0.955191
Muscle	FHL1	2.99902	2091.28	1	0.440392	0.43296	0.7591	P	0.953846
Muscle	CNBP	2.1636	896.95	0.992528	0.327755	0.19348	-0.477615	P	0.952677
Muscle	ADCK2	-0.889803	10.9082	0.0410959	0.411088	0.396292	0.112388	U	0.947912
Muscle	PUS1	-0.785511	4.3558	0.0946451	0.594061	0.342576	-0.113021	P	0.947058
Muscle	SYNE2	0.296054	22.2671	0.612702	0.637291	0.300474	-0.276879	P	0.946442
Muscle	MTMR14	0.520004	29.9548	0.653798	0.459244	0.235686	-0.377743	P	0.946192
Muscle	LDB3	2.90096	468.437	1	0.728625	0.713885	1.5682	P	0.945526
Muscle	TNPO3	-0.0005919	25.2568	0.437111	0.363612	0.22323	-0.388423	P	0.94528
Muscle	DNM2	-0.49936	43.7627	0.18929	0.289871	0.214618	-0.423923	P	0.937726
Muscle	TNNI2	3.76124	3608.69	1	0.65041	0.53685	1.11814	P	0.937142
Muscle	DES	1.93615	12450.8	1	0.27741	0.384083	-0.0163752	P	0.933758
Muscle	LPIN1	2.06343	123.714	0.972603	0.862176	0.32683	-0.217106	P	0.932327
Muscle	PABPN1	-1.17041	63.22	0.00871731	0.356318	0.299865	-0.226852	U	0.931627
Muscle	SLC25A4	2.38535	405.396	1	0.430133	0.686701	0.662381	P	0.931361
Muscle	POMGNT1	0.187861	33.3059	0.590286	0.397001	0.308514	-0.277889	P	0.926195
Muscle	EMD	-0.308357	89.6327	0.247821	0.368792	0.210697	-0.421939	P	0.926192
Muscle	CLCN1	3.30942	15.2378	1	0.88392	0.500623	1.36643	P	0.924834
Muscle	STIM1	1.24962	61.0399	0.872976	0.375343	0.115228	-0.681482	P	0.915267
Muscle	GMPPB	-0.856885	7.63877	0.0336239	0.522085	0.219937	-0.39498	U	0.9098
Muscle	COX10	2.44369	30.1921	0.998755	0.342212	0.0929846	-0.759043	P	0.908692
Muscle	CRYAB	1.53944	1608.71	1	0.507678	0.30276	-0.017381	P	0.905478
Muscle	DMPK	0.333473	115.172	0.891656	0.572849	0.403552	-0.0294458	P	0.90393
Muscle	RRM2B	1.05609	24.0529	0.929016	0.573246	0.190881	-0.45929	P	0.903801
Muscle	KLHL40	3.7541	349.926	1	0.66098	0.270068	-0.205986	P	0.901575
Muscle	SGCA	2.75599	236.865	1	0.292409	0.260127	-0.497882	P	0.901537
Muscle	MBNL1	0.368527	80.7441	0.895392	0.375457	0.205809	-0.360281	U	0.901313
Muscle	TCAP	3.33322	2808.32	1	0.609766	0.803902	1.70483	P	0.898243
Muscle	MICU1	0.17084	41.9831	0.696139	0.304331	0.348025	-0.129928	P	0.895273
Muscle	DAG1	0.690891	59.9768	0.910336	0.358345	0.157013	-0.460229	P	0.890243
Muscle	HNRNPDL	-0.615828	104.04	0.134496	0.366348	0.287875	-0.272694	P	0.884312
Muscle	TOR1AIP1	-0.232847	16.861	0.410959	0.346346	0.2434	-0.357378	U	0.883029
Muscle	CAPN3	3.77715	283.676	1	0.488128	0.8599	1.97511	P	0.881043
Muscle	FKTN	-0.853637	3.04112	0.01868	0.399699	0.344458	0.0762383	U	0.87322
Muscle	POLG2	-0.730254	4.3826	0.0398506	0.385074	0.287754	-0.322385	P	0.873195
Muscle	POMT2	0.127021	14.0365	0.511831	0.772077	0.137499	-0.271408	P	0.868566
Muscle	DYSF	0.531131	50.0723	1	0.545841	0.523405	0.877551	P	0.866552
Muscle	SGCG	2.63773	61.435	1	0.608691	0.827282	2.00322	P	0.862747
Muscle	SGCB	0.430756	49.1993	0.921544	0.343694	0.57363	0.974394	P	0.858026
Muscle	TMEM43	-0.662833	50.335	0.102117	0.592379	0.205961	-0.443357	P	0.842104
Muscle	ZMPSTE24	-0.902151	13.5627	0.0485679	0.482113	0.241416	-0.476161	P	0.84052
Muscle	TFAM	-0.519193	6.39284	0.0971357	0.313254	0.273192	-0.303366	U	0.837556
Muscle	SMCHD1	-0.762362	8.37898	0.0124533	0.373999	0.217111	-0.383543	P	0.835838
Muscle	MCCC1	-0.702258	11.1197	0.0498132	0.300885	0.314852	-0.226424	P	0.83401
Muscle	TOP3A	-1.04538	4.94921	0.00622665	0.319235	0.184475	-0.501957	U	0.827265
Muscle	INPP5K	-0.349255	28.0055	0.32005	0.409721	0.284086	-0.298903	U	0.825008
Muscle	GNE	-0.807577	5.81793	0.00996264	0.339536	0.22716	-0.451529	P	0.814352
Muscle	YARS2	-0.559695	7.57794	0.110834	0.283902	0.303268	-0.294753	P	0.813329
Muscle	MSTN	0.868451	2.35637	0.714819	1.27554	0.709838	0.994033	U	0.811915
Muscle	LRP1	-0.823397	15.7014	0.014944	0.766238	0.173425	-0.446883	N	0.808367
Muscle	PDGFRA	-0.650875	6.55936	0.014944	0.822256	0.222648	-0.354737	U	0.798315
Muscle	PAX3	0.421168	1.15976	1	0.704097	0.267787	-0.348067	P	0.791038
Muscle	TWNK	0.465671	9.60244	0.718555	0.593288	0.147447	-0.657408	U	0.783707
Muscle	LARGE1	0.9209	15.3169	0.951432	0.468204	0.171357	-0.361305	U	0.782145
Muscle	SYNE1	-0.750013	4.31262	0.0273973	0.574499	0.262255	-0.33807	P	0.780201
Muscle	LAMA2	-0.358629	20.047	0.348692	0.825058	0.394043	0.0622166	P	0.776538
Muscle	FKRP	-0.317009	8.58449	0.307597	0.306108	0.0448319	-0.619558	P	0.766663
Muscle	POMGNT2	0.00251975	24.7168	0.463263	0.62637	0.159485	-0.508261	P	0.757415
Muscle	FRG1	-1.0359	12.5443	0.011208	0.308072	0.204234	-0.49657	U	0.75683
Muscle	COL6A2	-0.746401	74.1077	0.00996264	0.793937	0.180142	-0.274184	P	0.751821
Muscle	FDX2	-0.715691	12.4412	0.0647572	0.359935	0.187733	-0.696415	U	0.75068
Muscle	B4GAT1	-0.477491	22.068	0.0909091	0.364863	0.198738	-0.49719	U	0.722851
Muscle	BVES	2.36905	32.92	1	0.391738	0.952677	2.51111	U	0.721787
Muscle	ANK2	-0.137334	11.2894	0.739726	0.401905	0.317836	-0.115039	U	0.715801
Muscle	KLHL31	1.78868	26.9335	0.998755	0.911955	0.211083	-0.429071	U	0.714634
Muscle	POMT1	-0.397272	13.1129	0.215442	0.289033	0.157623	-0.309822	P	0.711328
Muscle	LMNA	-0.642065	64.8878	0.0311333	0.368793	0.200335	-0.446891	P	0.705854
Muscle	NDST1	-1.0578	9.59743	0	0.293647	0.156289	-0.396734	U	0.704309
Muscle	POLG	-0.423841	22.4538	0.191781	0.338737	0.172824	-0.564535	P	0.693076
Muscle	TRAPPC11	-0.729835	12.2749	0.0697385	0.329395	0.166341	-0.646975	P	0.691644
Muscle	PYROXD1	-0.195322	6.64623	0.353674	0.386429	0.195984	-0.540866	U	0.690015
Muscle	DGUOK	-1.56597	12.1868	0	0.343682	0.19185	-0.293152	P	0.683801
Muscle	HLA-A	-0.787886	188.344	0.00622665	0.571652	0.15531	-0.529571	U	0.681962
Muscle	CHKB	-1.11395	21.0437	0.0174346	0.566309	0.178082	-0.102422	P	0.668501
Muscle	MTM1	-0.612078	6.78174	0.103362	0.272892	0.344527	0.0700877	U	0.665924
Muscle	VMA21	-1.10182	6.43064	0.00996264	0.343848	0.0968244	-0.799365	P	0.663043
Muscle	ITGA7	0.184212	123.825	0.955168	0.448459	0.305158	0.117142	P	0.654501
Muscle	ZFPM2	0.0710627	5.97709	0.897883	0.378316	0.177875	-0.583589	U	0.648809
Muscle	SGCD	1.02601	16.6045	0.978829	0.578594	0.819925	1.28941	P	0.648641
Muscle	COL4A1	-0.555322	30.2152	0.11208	0.620236	0.125457	-0.487353	P	0.63303
Muscle	COL6A1	-0.720623	69.3979	0.00871731	0.722915	0.114363	-0.547621	P	0.614496
Muscle	NR2F2	-0.617115	13.9344	0.0386052	0.524765	0.177351	-0.45672	U	0.61386
Muscle	FAT1	-0.936839	1.20677	0	0.866665	0.0942948	-0.564939	U	0.602009
Muscle	PLN	0.236793	218.125	1	0.656934	0.766847	1.65333	U	0.601019
Muscle	KIF7	-0.901814	1.21052	0.0161893	0.916016	0.120837	-0.622957	P	0.575478
Muscle	DNA2	-0.486708	1.37711	0.179328	0.698887	0.211187	-0.402089	P	0.568982
Muscle	TK2	-1.20097	4.83917	0	0.381033	0.151515	-0.373403	P	0.564999
Muscle	CNTN1	-0.530961	0.20117	0	1.18607	0.0892975	-0.476272	U	0.555229
Muscle	SELENON	-0.512788	40.8132	0.209215	0.608195	0.0774595	-0.715021	N	0.545723
Muscle	MEGF10	0.196097	2.45736	0.977584	1.19052	0.234629	-0.24973	P	0.531394
Muscle	ORAI1	0.0201228	21.9249	0.703611	0.414795	0.181507	-0.581759	P	0.528508
Muscle	SLIT3	-0.697243	3.32904	0.00622665	0.988866	0.00373599	-0.901958	U	0.51446
Muscle	ANGPTL2	-0.0886389	41.9081	0.529265	0.862267	0.266086	-0.383597	N	0.462715
Muscle	LIMS2	-0.65715	13.8052	0.0136986	0.419511	0.0931922	-0.674836	U	0.445155
Muscle	PAX7	2.27108	1.81114	1	0.746969	0.558738	0.769151	U	0.441419
Muscle	POMK	-0.447441	0.825156	0.206725	0.537049	0.193137	-0.528743	P	0.397623
Muscle	KY	0.029813	1.85931	0.43462	1.78607	0.997509	3.71875	U	0.386495
Muscle	GATA4	-0.319831	0.0280777	0.174346	2.77078	0.169365	-0.552714	U	0.327653
Muscle	FREM1	-0.593694	0.356989	0.0311333	1.05077	0.0709838	-0.640771	N	0.3218
Muscle	COL6A3	-0.358692	19.2218	0.0684932	0.820289	0.179639	-0.489202	P	0.306359
Muscle	WT1	-0.264866	0.0172877	0.0983811	4.51554	0.234039	-0.434569	U	0.300212
Muscle	SCN5A	-0.0715571	1.86673	0.60274	2.53002	0.315835	-0.29105	U	0.272505
Muscle	HCN4	-0.255453	0.00921026	0.0635118	3.76008	0.208904	-0.392634	N	0.20314
Muscle	CTSS	-0.371019	1.96977	0.00498132	0.762242	0.16296	-0.526937	N	0.190582
Muscle	SOX7	-0.253781	8.74429	0.389788	1.29271	0.0395392	-0.857702	U	0.160902
Muscle	HCN1	-0.197041	0.399667	0.763387	1.69486	0.608136	1.08875	N	0.15593
Muscle	FBN2	-0.141493	0.029001	0.0124533	2.85052	0.125713	-0.546257	U	0.151428
Muscle	SPEG	0.68018	82.8314	1	0.43403	0.825654	0.535593	P	0.0927018
Muscle	CCDC78	-0.35886	0.118663	0	1.01766	0.305729	-0.241664	P	0.0734734
Ovary	TP53	1.2369	33.6616	0.966667	0.316676	0.765126	0.626841	N	0.93906
Ovary	PIK3CA	0.561935	16.5587	0.888889	0.305281	0.572562	0.208271	P	0.906219
Ovary	MSH6	4.07395	41.3467	1	0.322513	0.820139	0.678169	P	0.905004
Ovary	PTEN	0.385114	34.1553	0.905556	0.314493	0.610151	0.121867	U	0.827819
Ovary	KRAS	-0.12102	13.5812	0.4	0.278535	0.653852	0.264471	N	0.82735
Ovary	CTNNB1	1.43447	202.904	0.988889	0.247492	0.725468	0.439863	P	0.82676
Ovary	MLH3	0.961164	11.7618	0.961111	0.206887	0.674383	0.325784	U	0.800141
Ovary	AKT2	1.47353	70.1401	0.994444	0.256365	0.808832	0.573727	U	0.793516
Ovary	TSC2	1.38734	79.465	1	0.219922	0.840741	0.785514	U	0.751678
Ovary	FMR1	1.71824	33.0293	0.988889	0.230987	0.807104	0.620846	P	0.742291
Ovary	FOXO3	0.847107	58.5177	0.988889	0.302222	0.730851	0.588227	U	0.708269
Ovary	SERPINH1	0.631051	152.569	0.994444	1.30695	0.716972	0.421151	U	0.685303
Ovary	FOXL2	8.155	103.703	1	0.482082	0.88831	1.03588	P	0.679259
Ovary	STK11	0.583867	40.3983	0.938889	0.235468	0.816931	0.81573	P	0.677604
Ovary	HDAC3	1.15817	82.8018	0.988889	0.141583	0.855877	0.764169	U	0.64679
Ovary	NR5A1	1.40548	74.7075	1	0.354488	0.889268	1.19937	P	0.638371
Ovary	MSH3	0.620797	8.04193	0.844444	0.273868	0.763964	0.512789	U	0.598427
Ovary	ERRFI1	0.712865	228.95	1	0.460334	0.68747	0.196213	U	0.586974
Ovary	FSHR	2.25463	1.31324	1	1.07755	0.788657	0.710666	U	0.57326
Ovary	APC	-0.401388	5.93724	0.155556	0.280516	0.75612	0.526764	N	0.518839
Ovary	FANCF	0.710383	6.56641	0.833333	0.403598	0.802339	0.417605	U	0.508562
Ovary	FGFR3	-0.47667	1.28111	0.0333333	1.47585	0.493093	-0.100862	N	0.407199
Ovary	AKT1	0.124505	55.0055	0.705556	0.184824	0.666698	0.37578	P	0.406293
Ovary	DIAPH2	0.277957	10.2972	0.905556	0.331758	0.727778	0.475526	P	0.318187
Ovary	HMGA1	-0.465586	8.484	0.00555556	0.684961	0.674479	0.263653	N	0.28419
Ovary	EMP2	0.237134	66.9291	0.983333	0.232322	0.938889	0.850719	U	0.251837
Ovary	OPCML	-0.279502	0.276642	0.416667	1.95756	0.575926	0.296976	P	0.243166
Ovary	CDH1	-0.509209	3.65151	0.85	0.907421	0.711149	0.476519	U	0.239658
Ovary	NR1H3	0.0024438	19.4893	0.9	0.430273	0.779424	0.691784	U	0.236507
Ovary	HFM1	0.862772	7.04129	1	0.356323	0.788889	0.00034484	P	0.141963
Ovary	PATL2	-0.145082	0.916722	0.755556	0.651688	0.369444	-0.115506	U	0.120953
Ovary	POF1B	-0.297822	0.201938	0.183333	0.975413	0.654348	0.198707	U	0.108601
Ovary	STAG3	0.090064	6.45723	0.966667	0.497966	0.961111	1.16613	P	0.0731775
Testis	CSNK2A2	3.33594	96.3399	1	0.239264	0.808941	1.30863	U	0.961053
Testis	STK11	5.0056	118.629	0.99723	0.225077	0.857954	1.33185	P	0.955857
Testis	CHEK2	0.925524	8.39498	1	0.321793	0.630623	0.470153	U	0.945209
Testis	NKX3-1	0.6135	38.2533	1	0.352024	0.461764	0.133258	U	0.933124
Testis	NR5A1	0.502908	32.6591	1	0.319531	0.60434	0.30004	U	0.933051
Testis	TEX11	6.0465	21.1912	1	0.354582	0.67933	0.418082	U	0.912613
Testis	DMC1	5.93065	14.0773	1	0.349503	0.777355	1.71022	U	0.900327
Testis	APC	-0.380882	6.15078	0.171745	0.24498	0.644947	0.543152	U	0.893809
Testis	CATSPER1	6.10378	45.9004	1	0.482124	0.987258	1.45884	U	0.882519
Testis	GOPC	0.145412	28.0012	0.781163	0.204768	0.551078	0.347043	U	0.88079
Testis	BRCA2	2.42225	4.6902	1	0.291882	0.748701	1.18789	U	0.878594
Testis	MEIOB	6.55632	76.8572	1	0.305866	0.66482	1.92119	U	0.86936
Testis	SYCE1	6.37446	118.864	1	0.268039	0.949777	2.21018	U	0.850703
Testis	AR	0.327634	7.63532	0.952909	0.412031	0.511051	0.190429	P	0.846256
Testis	TAF4B	2.1537	10.1233	1	0.300471	0.784765	1.46511	U	0.839628
Testis	TGFBR2	-0.919645	15.6376	0.00277008	0.753417	0.400197	-0.128427	U	0.820546
Testis	AGFG1	1.37098	38.9481	1	0.247573	0.811413	1.16217	U	0.813416
Testis	PTEN	-0.344879	21.243	0.232687	0.201497	0.572185	0.559633	P	0.798746
Testis	RNASEL	-0.789524	2.48549	0.0277008	0.441917	0.506002	-0.0983749	U	0.768486
Testis	AURKC	6.44021	85.4036	1	0.327103	0.941828	1.11597	U	0.76848
Testis	MXI1	-0.392127	36.1039	0.293629	0.348271	0.637758	0.493397	U	0.749852
Testis	MAD1L1	3.30885	18.5912	0.99723	0.217052	0.961137	1.99028	U	0.71994
Testis	BCL10	0.232099	12.9629	0.966759	0.18353	0.773089	1.03863	U	0.71966
Testis	SYCP3	6.55592	176.911	1	0.306619	0.796399	0.856384	U	0.718329
Testis	TCTE1	6.26214	70.7569	1	0.387959	0.919074	2.35933	U	0.718283
Testis	KLHL10	6.29037	117.282	1	0.428585	0.984254	2.31786	U	0.717111
Testis	ARL2BP	1.66759	20.1597	0.969529	0.329092	0.977839	1.57614	U	0.700518
Testis	SPATA20	4.65241	270.274	1	0.32509	0.993273	1.58587	U	0.699336
Testis	CTNNB1	-0.717773	64.0583	0.033241	0.298916	0.502897	0.113898	U	0.650272
Testis	KRAS	-0.459488	11.0137	0.124654	0.251971	0.407742	-0.0582844	U	0.634222
Testis	TEX14	6.47482	40.5366	1	0.300621	0.923823	2.35486	U	0.613766
Testis	CDH1	-0.564746	0.814421	0.307479	0.436673	0.451604	-0.0475494	N	0.612089
Testis	CABYR	6.37041	250.746	1	0.39401	0.99169	2.58877	U	0.591521
Testis	ARMC2	5.32664	25.0213	1	0.354519	0.066482	-0.547825	U	0.590454
Testis	BSCL2	2.64335	263.496	1	0.262348	0.939787	1.26837	U	0.58456
Testis	KLF6	-0.854293	23.0751	0.00277008	0.340727	0.653088	0.429205	U	0.563817
Testis	FGFR3	-0.120833	42.3823	1	0.348168	0.52462	0.145715	P	0.535326
Testis	KIT	-0.404205	6.14263	0.229917	0.423263	0.431553	-0.0985916	U	0.535055
Testis	PLCZ1	6.09218	61.8126	1	0.513779	0.688827	-0.181626	U	0.530173
Testis	SYCP2	6.05848	44.0994	1	0.28817	1	5.15682	U	0.529657
Testis	SLC26A8	5.76877	66.1222	1	0.425881	1	1.3262	U	0.506708
Testis	PMFBP1	6.18127	27.8671	1	0.444967	0.878116	0.50803	U	0.496307
Testis	EHBP1	0.463155	36.5183	0.966759	0.311939	0.951247	2.19767	U	0.456478
Testis	NUPR1	-0.328628	36.4647	0.188366	0.470148	0.482918	-0.0894999	U	0.40927
Testis	CFAP43	5.40617	43.9741	1	0.36264	0.939058	0.376343	U	0.38633
Testis	DNAH1	3.98908	27.1928	1	0.279613	0.970914	0.558661	U	0.333948
Testis	BRDT	6.32798	115.424	1	0.416313	1	1.90825	U	0.298051
Testis	ZFHX3	-0.472981	3.63831	0.0886427	0.264552	0.658686	0.331125	U	0.255975
Testis	CFAP44	1.92179	12.8507	1	0.232603	0.944598	0.988901	U	0.231128
Testis	NANOS1	-0.306643	1.46024	0.279778	0.302469	0.67036	0.849867	U	0.186065
Testis	HOXB13	-0.105192	0.194483	0.99723	0.522857	0.992613	0.576184	N	0.167533
Testis	CATSPER2	4.4483	24.7984	1	0.325885	1	-0.0546206	U	0.116311
Testis	CFTR	-0.0671276	1.72946	1	0.270751	0.797529	0.968987	N	0.0913955
Testis	MSMB	-0.072487	11.8117	1	0.651447	0.99446	1.74147	U	0.0795737
