# Supplementary material for: Prioritizing and characterizing functionally relevant genes across human tissues
Source: PLoS Comput Biol. 2021 Jul 16;17(7):e1009194. doi: 10.1371/journal.pcbi.1009194 (PMC8284802; doi:10.1371/journal.pcbi.1009194)
Supplement: S4 Table — (XLSX) [file pcbi.1009194.s008.xlsx]

## Sheet: Table S4
Tissue	Transcription Factor	FUGUE Score
Adipose_Tissue	NR1H3	0.962324
Adipose_Tissue	STAT5A	0.960867		Supplementary Table S4. Top 20 TRG transcription factors in each tissue ranked by FUGUE scores.
Adipose_Tissue	PPARG	0.945495
Adipose_Tissue	EBF1	0.941477
Adipose_Tissue	EBF3	0.920992
Adipose_Tissue	ZNF423	0.90926
Adipose_Tissue	SMAD3	0.905838
Adipose_Tissue	MECOM	0.901733
Adipose_Tissue	NFKB1	0.898401
Adipose_Tissue	HLX	0.892046
Adipose_Tissue	ETS1	0.883666
Adipose_Tissue	SMAD1	0.882402
Adipose_Tissue	ARNT	0.87883
Adipose_Tissue	MYC	0.878448
Adipose_Tissue	NR3C1	0.87614
Adipose_Tissue	NR5A2	0.8667
Adipose_Tissue	ZNF521	0.865136
Adipose_Tissue	JUN	0.859809
Adipose_Tissue	RELA	0.852561
Adipose_Tissue	KLF11	0.851738
Adipose_Tissue	SMAD4	0.85097
Adrenal_Gland	FOXK2	0.984011
Adrenal_Gland	MLXIPL	0.975554
Adrenal_Gland	PEG3	0.975348
Adrenal_Gland	NR5A1	0.973948
Adrenal_Gland	NR0B1	0.971616
Adrenal_Gland	GATA6	0.971204
Adrenal_Gland	ZNF219	0.967272
Adrenal_Gland	SMAD3	0.965019
Adrenal_Gland	ZBTB21	0.963537
Adrenal_Gland	LEF1	0.960154
Adrenal_Gland	FOXO4	0.958122
Adrenal_Gland	TBX3	0.957815
Adrenal_Gland	STAT2	0.95585
Adrenal_Gland	LCOR	0.955564
Adrenal_Gland	FOXK1	0.954841
Adrenal_Gland	CEBPZ	0.954505
Adrenal_Gland	ZNF431	0.954396
Adrenal_Gland	NFE2L2	0.953715
Adrenal_Gland	FOSL2	0.952686
Adrenal_Gland	NR2F1	0.951542
Adrenal_Gland	JAZF1	0.949363
Bladder	MSX2	0.931921
Bladder	MAFG	0.922205
Bladder	SMAD3	0.915392
Bladder	PITX2	0.887443
Bladder	NFE2L2	0.884782
Bladder	GATA2	0.877228
Bladder	SP1	0.876663
Bladder	NPAS2	0.876048
Bladder	HOXA1	0.875139
Bladder	RELA	0.86822
Bladder	ZNF350	0.860126
Bladder	TEAD1	0.849179
Bladder	HOXA10	0.842046
Bladder	NR2F1	0.837563
Bladder	GTF3A	0.831864
Bladder	STAT6	0.814996
Bladder	FOXF1	0.814638
Bladder	LCOR	0.812043
Bladder	CDC5L	0.802589
Bladder	TP53	0.800988
Bladder	ZNF266	0.786536
Blood	GTF2I	0.989661
Blood	ATF4	0.982401
Blood	SMAD4	0.979791
Blood	CDC5L	0.975798
Blood	NFKB1	0.974953
Blood	ZNF746	0.973578
Blood	AKAP8	0.972793
Blood	ZNF444	0.972566
Blood	ARNT	0.970374
Blood	IKZF1	0.970007
Blood	SRCAP	0.969666
Blood	PIN1	0.96906
Blood	RELA	0.967606
Blood	NR2C2	0.967417
Blood	MAX	0.96723
Blood	HIF1A	0.967148
Blood	STAT3	0.966918
Blood	RARA	0.966162
Blood	ZNF224	0.965348
Blood	DNTTIP1	0.965152
Blood	ZSCAN9	0.964025
Blood_Vessel	STAT3	0.930892
Blood_Vessel	RELA	0.91576
Blood_Vessel	NFAT5	0.903068
Blood_Vessel	TRERF1	0.89779
Blood_Vessel	ARNT	0.891347
Blood_Vessel	TEAD2	0.887452
Blood_Vessel	ELK4	0.886386
Blood_Vessel	CUX1	0.872521
Blood_Vessel	MAFK	0.866767
Blood_Vessel	TP53	0.864844
Blood_Vessel	SKI	0.861957
Blood_Vessel	SRF	0.857381
Blood_Vessel	ZBTB16	0.855238
Blood_Vessel	YBX1	0.853647
Blood_Vessel	KLF13	0.853545
Blood_Vessel	NFYB	0.851008
Blood_Vessel	FOXC2	0.84711
Blood_Vessel	HEY2	0.846099
Blood_Vessel	ZKSCAN5	0.844643
Blood_Vessel	CDC5L	0.840746
Blood_Vessel	EBF1	0.840061
Brain	PIN1	0.972097
Brain	THRA	0.966668
Brain	ARNT	0.958642
Brain	SP1	0.954405
Brain	NKRF	0.952327
Brain	STAT5B	0.952275
Brain	SMAD4	0.950704
Brain	SMAD3	0.949102
Brain	KDM2A	0.945609
Brain	POU3F2	0.945314
Brain	STAT3	0.943253
Brain	ZNF526	0.942655
Brain	ZFPM2	0.942451
Brain	ELK4	0.941345
Brain	GTF2I	0.941282
Brain	CTCF	0.937126
Brain	SP100	0.937091
Brain	FOXG1	0.936089
Brain	OLIG2	0.931811
Brain	SETDB1	0.929395
Brain	PURA	0.928577
Breast	NR1H3	0.918478
Breast	ZNF3	0.917829
Breast	ZNF621	0.912159
Breast	NFKB1	0.911193
Breast	STAT5A	0.897952
Breast	MYSM1	0.894828
Breast	STAT3	0.893693
Breast	SRCAP	0.890778
Breast	ALX4	0.89051
Breast	TGIF1	0.889448
Breast	RELA	0.883491
Breast	TBX3	0.881328
Breast	TWIST1	0.880899
Breast	XBP1	0.877167
Breast	ZNF561	0.871893
Breast	SP3	0.870872
Breast	TFAP2B	0.868267
Breast	REST	0.866689
Breast	HSF1	0.866351
Breast	SMAD4	0.865376
Breast	AR	0.865001
Cervix_Uteri	PBX1	0.952016
Cervix_Uteri	NR2F1	0.951296
Cervix_Uteri	AR	0.942243
Cervix_Uteri	ARNT	0.934929
Cervix_Uteri	STAT2	0.931095
Cervix_Uteri	HOXD9	0.918434
Cervix_Uteri	CREBZF	0.917169
Cervix_Uteri	SMAD3	0.916813
Cervix_Uteri	SMAD4	0.907815
Cervix_Uteri	MAF	0.903995
Cervix_Uteri	ESR1	0.903755
Cervix_Uteri	MEIS2	0.897926
Cervix_Uteri	TP53	0.883006
Cervix_Uteri	IRF3	0.882248
Cervix_Uteri	SNAI2	0.881544
Cervix_Uteri	STAT3	0.876412
Cervix_Uteri	STAT5B	0.873976
Cervix_Uteri	HIC1	0.871649
Cervix_Uteri	TEAD3	0.870322
Cervix_Uteri	SAFB2	0.866788
Cervix_Uteri	SOX4	0.866028
Colon	FOXF1	0.969451
Colon	PBX3	0.963413
Colon	MEIS2	0.955885
Colon	HOXD13	0.951162
Colon	HNF4A	0.944825
Colon	FOXP2	0.930238
Colon	RELA	0.930198
Colon	HAND1	0.919612
Colon	FOXP1	0.918412
Colon	SATB1	0.918211
Colon	HOXA9	0.917992
Colon	HOXA10	0.915856
Colon	HAND2	0.913972
Colon	UBP1	0.908731
Colon	PBX1	0.904607
Colon	SETBP1	0.904492
Colon	VEZF1	0.903973
Colon	SRF	0.90276
Colon	ATF4	0.902747
Colon	GLYR1	0.900704
Colon	MEIS1	0.893666
Esophagus	PITX1	0.948338
Esophagus	RELA	0.945371
Esophagus	MAX	0.937558
Esophagus	PRDM1	0.9338
Esophagus	ZHX3	0.92935
Esophagus	SMAD3	0.928264
Esophagus	FOXF2	0.924925
Esophagus	SMAD4	0.921138
Esophagus	MEIS1	0.919342
Esophagus	FOXP1	0.915631
Esophagus	STAT3	0.914986
Esophagus	ZNF468	0.912397
Esophagus	CDC5L	0.912068
Esophagus	STAT6	0.910606
Esophagus	SRF	0.910183
Esophagus	HLF	0.909482
Esophagus	HSF1	0.908876
Esophagus	TP53	0.908121
Esophagus	SREBF1	0.903903
Esophagus	NFE2L2	0.903389
Esophagus	NFKB1	0.902478
Fallopian_Tube	TP53	0.967463
Fallopian_Tube	MYC	0.959159
Fallopian_Tube	GATA6	0.950336
Fallopian_Tube	PBX1	0.938392
Fallopian_Tube	ESR1	0.933808
Fallopian_Tube	MEIS1	0.930055
Fallopian_Tube	ZNF611	0.917053
Fallopian_Tube	ATF3	0.889601
Fallopian_Tube	SRF	0.880553
Fallopian_Tube	EGR1	0.880385
Fallopian_Tube	ZNF497	0.877389
Fallopian_Tube	WT1	0.873521
Fallopian_Tube	NR2F1	0.87164
Fallopian_Tube	AR	0.86958
Fallopian_Tube	JUNB	0.868769
Fallopian_Tube	GATA2	0.86451
Fallopian_Tube	SALL1	0.864202
Fallopian_Tube	EMX2	0.85661
Fallopian_Tube	IRF3	0.850433
Fallopian_Tube	MZF1	0.848802
Fallopian_Tube	HOXA5	0.84854
Heart	CHCHD3	0.976236
Heart	NKX2-5	0.971402
Heart	GATA4	0.971186
Heart	TBX5	0.962299
Heart	TBX20	0.954869
Heart	ZNF791	0.928974
Heart	ZNF410	0.923398
Heart	ZNF79	0.916075
Heart	ZNF136	0.913505
Heart	ZNF260	0.910231
Heart	ZNF195	0.910002
Heart	ZNF329	0.907237
Heart	TIGD1	0.906465
Heart	ZBTB25	0.904469
Heart	ZNF37A	0.901608
Heart	ZNF224	0.899056
Heart	ZNF292	0.897437
Heart	ZNF717	0.897383
Heart	ZBTB3	0.896785
Heart	KLF13	0.896228
Heart	ZNF230	0.891913
Kidney	STAT3	0.984308
Kidney	SAFB	0.981432
Kidney	ZNF408	0.980328
Kidney	FOXI1	0.980191
Kidney	RELA	0.979378
Kidney	GTF2I	0.978786
Kidney	TERF1	0.976412
Kidney	SETDB1	0.976274
Kidney	HOXB9	0.976219
Kidney	NFKB1	0.976153
Kidney	PPARA	0.975817
Kidney	IRF3	0.975655
Kidney	MECP2	0.974741
Kidney	HOXA9	0.974506
Kidney	HIVEP1	0.974399
Kidney	ZHX2	0.973735
Kidney	UBP1	0.972982
Kidney	ZNF324	0.971598
Kidney	NR1H4	0.971559
Kidney	ATF4	0.971517
Kidney	TCF20	0.971484
Liver	NR1I2	0.995832
Liver	NR1I3	0.994609
Liver	PROX1	0.99199
Liver	ATF5	0.987249
Liver	ZGPAT	0.982934
Liver	FOXA3	0.981128
Liver	CREB3L3	0.979421
Liver	HNF1A	0.977665
Liver	NR5A2	0.976
Liver	NR1H4	0.975579
Liver	ONECUT1	0.974092
Liver	HNF4A	0.972072
Liver	FOXA2	0.969296
Liver	CEBPA	0.966252
Liver	RORC	0.964077
Liver	NR2F6	0.960908
Liver	ZKSCAN1	0.959584
Liver	CEBPG	0.955641
Liver	NR1H3	0.951175
Liver	MLXIP	0.948606
Liver	ZNF292	0.946759
Lung	FOXA2	0.935589
Lung	TEAD2	0.924698
Lung	KIN	0.91439
Lung	IRF1	0.887699
Lung	RELA	0.881908
Lung	ZNF746	0.881689
Lung	HIF3A	0.877221
Lung	STAT3	0.874276
Lung	ARNT	0.866616
Lung	FLI1	0.86123
Lung	RARA	0.858522
Lung	NFKB1	0.857437
Lung	HIF1A	0.854078
Lung	NR2F1	0.847601
Lung	ETS1	0.834274
Lung	FOXF1	0.832635
Lung	HOXB5	0.832234
Lung	EPAS1	0.830175
Lung	SP100	0.827681
Lung	IRF3	0.825956
Lung	TBX4	0.825288
Muscle	NFIC	0.981247
Muscle	MEF2C	0.97945
Muscle	SMAD3	0.978665
Muscle	NFE2L1	0.976289
Muscle	NR3C1	0.974931
Muscle	HSF1	0.974591
Muscle	RXRA	0.973917
Muscle	MAFG	0.973633
Muscle	ESRRA	0.972258
Muscle	NFATC3	0.971547
Muscle	PREB	0.971443
Muscle	ESRRB	0.969345
Muscle	ZBTB16	0.969321
Muscle	HSF2	0.969199
Muscle	SIX1	0.96899
Muscle	FOXO1	0.968478
Muscle	GTF2IRD1	0.968108
Muscle	TEAD4	0.965746
Muscle	RORC	0.965734
Muscle	KCMF1	0.964786
Muscle	HOXC10	0.964201
Nerve	BNC2	0.917979
Nerve	NR1H3	0.911528
Nerve	NR2F1	0.90457
Nerve	NFATC1	0.90129
Nerve	FOXO1	0.900961
Nerve	STAT3	0.895494
Nerve	SREBF2	0.886884
Nerve	ZEB2	0.877887
Nerve	TEAD1	0.870596
Nerve	NR4A1	0.86866
Nerve	HOXC6	0.865006
Nerve	TERF1	0.863649
Nerve	SP1	0.862387
Nerve	STAT2	0.856503
Nerve	NR2F2	0.855826
Nerve	SMAD3	0.854113
Nerve	MAF	0.833854
Nerve	NR3C1	0.81234
Nerve	RELA	0.802912
Nerve	PLAG1	0.79925
Nerve	KLF15	0.79757
Ovary	RELA	0.985803
Ovary	JUND	0.983137
Ovary	ARNT	0.980851
Ovary	SP1	0.96422
Ovary	NR4A1	0.964107
Ovary	AR	0.961883
Ovary	SMAD3	0.959258
Ovary	STAT5B	0.957064
Ovary	HOXC6	0.955748
Ovary	STAT3	0.954807
Ovary	L3MBTL3	0.951165
Ovary	NKRF	0.948719
Ovary	CEBPD	0.946212
Ovary	SKI	0.945606
Ovary	ZNF512	0.943377
Ovary	SAFB2	0.942885
Ovary	PBX1	0.941981
Ovary	JUN	0.938966
Ovary	JUNB	0.937949
Ovary	NR2F1	0.936875
Ovary	PHF1	0.934411
Pancreas	XBP1	0.955597
Pancreas	HNF1B	0.952485
Pancreas	PDX1	0.952196
Pancreas	BHLHA15	0.948342
Pancreas	NR5A2	0.943893
Pancreas	FOXA2	0.943787
Pancreas	PTF1A	0.940261
Pancreas	PROX1	0.924985
Pancreas	ZNF484	0.924126
Pancreas	PRDM10	0.921995
Pancreas	HNF1A	0.9178
Pancreas	ZBTB37	0.916996
Pancreas	ZNF507	0.912652
Pancreas	ZNF250	0.911831
Pancreas	ZNF582	0.911715
Pancreas	ZNF567	0.910076
Pancreas	GATA4	0.903904
Pancreas	SGSM2	0.902813
Pancreas	RFX6	0.900791
Pancreas	ZNF543	0.899852
Pancreas	ZNF480	0.894012
Pituitary	STAT2	0.98149
Pituitary	L3MBTL1	0.979439
Pituitary	THAP7	0.9784
Pituitary	ZNF76	0.97377
Pituitary	ETV5	0.972739
Pituitary	PCGF2	0.963706
Pituitary	MZF1	0.958178
Pituitary	PITX2	0.954086
Pituitary	ZNF512B	0.953956
Pituitary	STAT4	0.952135
Pituitary	ZMAT1	0.948169
Pituitary	FOXL2	0.943505
Pituitary	MSX1	0.942688
Pituitary	REST	0.941573
Pituitary	TCF4	0.941143
Pituitary	E2F4	0.940824
Pituitary	IRF3	0.928357
Pituitary	FOXI2	0.927158
Pituitary	LCOR	0.924778
Pituitary	FOXK1	0.924741
Pituitary	FOXO6	0.92396
Prostate	TBX3	0.947323
Prostate	AR	0.947268
Prostate	HOXA9	0.945908
Prostate	RELA	0.944823
Prostate	SPDEF	0.942465
Prostate	MEIS2	0.926686
Prostate	NFKB1	0.925557
Prostate	SMAD3	0.92287
Prostate	HSF1	0.921428
Prostate	STAT3	0.921248
Prostate	SAFB2	0.921003
Prostate	IRF3	0.919513
Prostate	STAT6	0.915375
Prostate	SMAD4	0.912618
Prostate	ELF3	0.911612
Prostate	ARNT	0.906981
Prostate	SOX9	0.905602
Prostate	ZUFSP	0.905419
Prostate	HINFP	0.902998
Prostate	ZFHX3	0.902064
Prostate	ZNF512B	0.896522
Salivary_Gland	SOX9	0.979237
Salivary_Gland	PITX2	0.966523
Salivary_Gland	ELF3	0.956877
Salivary_Gland	PAX3	0.956584
Salivary_Gland	XBP1	0.952708
Salivary_Gland	NR3C2	0.943477
Salivary_Gland	FOXI1	0.933518
Salivary_Gland	TFCP2L1	0.929601
Salivary_Gland	ZHX1	0.929433
Salivary_Gland	REST	0.926057
Salivary_Gland	KLF3	0.925881
Salivary_Gland	EHF	0.92576
Salivary_Gland	NKX2-3	0.915476
Salivary_Gland	ELK4	0.914998
Salivary_Gland	SOX4	0.913656
Salivary_Gland	ETV6	0.909795
Salivary_Gland	RUNX1	0.909631
Salivary_Gland	TRPS1	0.907644
Salivary_Gland	ZKSCAN1	0.907203
Salivary_Gland	ESRRA	0.906223
Salivary_Gland	SRCAP	0.903467
Skin	RARG	0.97726
Skin	MYC	0.962018
Skin	HOXC11	0.940523
Skin	SMAD3	0.936996
Skin	LIN54	0.93568
Skin	PA2G4	0.930117
Skin	TWIST1	0.927716
Skin	ETV3	0.921832
Skin	ARNT	0.921552
Skin	NFKB1	0.921511
Skin	SIM1	0.918861
Skin	HMGA2	0.918281
Skin	ZNF181	0.916069
Skin	NME2	0.910811
Skin	TCF4	0.910464
Skin	SP1	0.91001
Skin	TFAP2C	0.909633
Skin	TERF2	0.908776
Skin	RORA	0.904948
Skin	ATF1	0.903023
Skin	RELA	0.90286
Small_Intestine	HOXA9	0.95226
Small_Intestine	IKZF3	0.949643
Small_Intestine	FOXP3	0.947367
Small_Intestine	BACH2	0.946355
Small_Intestine	TFEC	0.944177
Small_Intestine	MBNL2	0.940759
Small_Intestine	SP140	0.938626
Small_Intestine	STAT5B	0.935674
Small_Intestine	ZNF589	0.93549
Small_Intestine	POU2F2	0.935393
Small_Intestine	SP100	0.931511
Small_Intestine	USF1	0.92912
Small_Intestine	IRF1	0.928545
Small_Intestine	NFATC2	0.928095
Small_Intestine	STAT2	0.927962
Small_Intestine	IRF8	0.927521
Small_Intestine	SP140L	0.926078
Small_Intestine	ZBTB14	0.925783
Small_Intestine	VDR	0.922989
Small_Intestine	HINFP	0.922321
Small_Intestine	ZNF740	0.92199
Spleen	STAT2	0.991261
Spleen	IRF8	0.986606
Spleen	IRF3	0.983953
Spleen	MAFB	0.981169
Spleen	ETS1	0.976766
Spleen	IKZF3	0.976336
Spleen	IRF9	0.974728
Spleen	PROX1	0.97134
Spleen	SP100	0.970744
Spleen	NFKB2	0.969369
Spleen	STAT5B	0.962189
Spleen	IKZF1	0.958989
Spleen	STAT3	0.957759
Spleen	STAT5A	0.955853
Spleen	BCL11A	0.955646
Spleen	RELA	0.953993
Spleen	IRF5	0.951291
Spleen	PBX2	0.950663
Spleen	NR5A1	0.948846
Spleen	USF1	0.944618
Spleen	ZBTB17	0.944306
Stomach	CDC5L	0.983262
Stomach	TERF2	0.981627
Stomach	ZNF462	0.98155
Stomach	ZHX2	0.979605
Stomach	ZHX1	0.979535
Stomach	ZNF423	0.978909
Stomach	DRAP1	0.977496
Stomach	NRF1	0.975834
Stomach	SON	0.971861
Stomach	TEAD2	0.971186
Stomach	NR2C1	0.970584
Stomach	ZNF148	0.969956
Stomach	GTF2IRD1	0.968048
Stomach	MAX	0.966542
Stomach	LIN54	0.965734
Stomach	RELA	0.964497
Stomach	TFCP2	0.963636
Stomach	NR4A1	0.962877
Stomach	STAT3	0.961066
Stomach	ISL1	0.96096
Stomach	NR3C1	0.960192
Testis	LMX1B	0.973821
Testis	WT1	0.971181
Testis	KMT2B	0.970923
Testis	E2F6	0.960672
Testis	NFATC3	0.960623
Testis	SP1	0.949549
Testis	KDM2A	0.948101
Testis	GATA4	0.947699
Testis	ELK1	0.943125
Testis	ZSCAN25	0.940643
Testis	ZNF92	0.937843
Testis	AR	0.937254
Testis	BBX	0.935735
Testis	USF2	0.934705
Testis	ZNF189	0.932732
Testis	HMG20A	0.929549
Testis	NR5A1	0.929141
Testis	BPTF	0.925865
Testis	SOX3	0.925135
Testis	CPEB1	0.924546
Testis	HMGA1	0.923123
Thyroid	SMAD3	0.933921
Thyroid	PKNOX1	0.918624
Thyroid	NKX2-1	0.91756
Thyroid	BHLHE41	0.910746
Thyroid	HHEX	0.909768
Thyroid	XPA	0.90493
Thyroid	TBX3	0.900499
Thyroid	MZF1	0.893508
Thyroid	IRF3	0.891236
Thyroid	ZNF384	0.887187
Thyroid	HSF1	0.885802
Thyroid	PCGF2	0.885329
Thyroid	PAX8	0.883588
Thyroid	MBD2	0.882396
Thyroid	RELA	0.878025
Thyroid	ZBED3	0.87738
Thyroid	PHF1	0.868059
Thyroid	STAT3	0.867546
Thyroid	FOXE1	0.865665
Thyroid	MBD6	0.865149
Thyroid	NFE2L2	0.864998
Uterus	SRF	0.949127
Uterus	HAND2	0.941769
Uterus	PGR	0.939315
Uterus	CENPT	0.932421
Uterus	GATA2	0.912564
Uterus	NFKB1	0.90936
Uterus	MEIS2	0.906574
Uterus	FOXO1	0.906019
Uterus	ZNF260	0.90248
Uterus	STAT3	0.89907
Uterus	WT1	0.89874
Uterus	PBX1	0.888976
Uterus	TBX2	0.869561
Uterus	E2F4	0.864133
Uterus	IRF3	0.861185
Uterus	ZNF362	0.860787
Uterus	HOXA10	0.860683
Uterus	SALL1	0.857342
Uterus	HOXD9	0.855886
Uterus	MITF	0.851346
Uterus	NR2F2	0.849714
Vagina	RELA	0.954133
Vagina	SMAD3	0.953968
Vagina	AR	0.950653
Vagina	SMAD4	0.946957
Vagina	ESR1	0.940204
Vagina	MAX	0.921419
Vagina	SP1	0.921382
Vagina	STAT3	0.913299
Vagina	NFKB1	0.90846
Vagina	ARNT	0.905898
Vagina	IRF3	0.905549
Vagina	SETDB1	0.901232
Vagina	HES1	0.898831
Vagina	LHX4	0.898699
Vagina	GRHL1	0.898605
Vagina	MEIS2	0.896229
Vagina	STAT6	0.893148
Vagina	ZNF511	0.889483
Vagina	TP53	0.88797
Vagina	STAT5B	0.887624
Vagina	REL	0.887376
