# Supplementary material for: Prioritizing and characterizing functionally relevant genes across human tissues
Source: PLoS Comput Biol. 2021 Jul 16;17(7):e1009194. doi: 10.1371/journal.pcbi.1009194 (PMC8284802; doi:10.1371/journal.pcbi.1009194)
Supplement: S6 Table — #TAD: Number of TADs with at least 2 genes covering all top 5% TRGs. Other columns are self-explanatory. (XLSX) [file pcbi.1009194.s010.xlsx]

## Sheet: Table S6
TISSUE	#TADs	Random #TADs	Std-dev of Random #TADs	Z-Score(#TADs)	Empirical P-value (#TADs)
Brain	472	475.386	10.2669	-0.3298	0.375		Supplementary Table S6: TAD statistics. #TAD: Number of TADs with at least 2 genes covering all top 5% TRGs. Other columns are self-explanatory.
Bladder	450	454.78	10.4424	-0.45775	0.3295
Liver	440	464.367	10.4378	-2.33449	0.008
Nerve	490	474.546	10.4014	1.48576	0.07
Spleen	413	459.922	10.4076	-4.50844	0
Blood_Vessel	453	462.475	10.5111	-0.90143	0.1765
Colon	431	468.718	10.5376	-3.57938	0
Blood	400	447.557	10.1048	-4.70638	0
Pituitary	439	471.744	10.1672	-3.22054	0.002
Stomach	456	469.447	10.9707	-1.22571	0.1125
Prostate	433	468.777	10.5536	-3.39002	0
Ovary	460	463.167	10.629	-0.29796	0.3965
Thyroid	446	469.009	9.83692	-2.33905	0.013
Muscle	427	464.802	10.497	-3.60122	0
Breast	477	471.947	10.2904	0.49104	0.308
Kidney	442	477.323	10.9432	-3.22784	0.001
Small_Intestine	435	466.098	10.247	-3.03485	0.001
Adipose_Tissue	486	476.386	10.5755	0.90908	0.1725
Salivary_Gland	461	481.38	10.6536	-1.91296	0.027
Esophagus	426	465.701	10.2122	-3.88759	0
Testis	456	469.863	10.2719	-1.3496	0.096
Vagina	477	475.679	10.4714	0.12615	0.442
Heart	462	478.509	10.3272	-1.59859	0.0555
Cervix_Uteri	453	469.969	10.3829	-1.63433	0.05
Pancreas	473	473.518	10.6486	-0.04864	0.473
Adrenal_Gland	445	475.814	10.4143	-2.95882	0.003
Fallopian_Tube	408	416.274	9.77686	-0.84628	0.204
Skin	469	472.457	10.6185	-0.32556	0.3685
Uterus	460	462.781	10.5316	-0.26406	0.3875
Lung	459	467.628	10.1593	-0.84927	0.211
